# Supplementary material for: Coinfection of Cage-Cultured Spotted Sea Bass (Lateolabrax maculatus) with Vibrio harveyi and Photobacterium damselae subsp. piscicida Associated with Skin Ulcer
Source: MDPI journal article supplement (doi:10.3390/microorganisms12030503), 2024-02-29

## Supplementary data

**Table S1.** Biochemical characteristics of *Vibrio harveyi* NH-LM1<sup>T</sup> and *Photobacterium damsela* subsp. *piscicida* NH-LM2<sup>T</sup>.

| Characteristic                               | NH-LM1 <sup>T</sup> | NH-LM2 <sup>T</sup> |
|----------------------------------------------|---------------------|---------------------|
| <b>Utilize of</b>                            |                     |                     |
| Potassium nitrate                            | -                   | -                   |
| L-tryptophan                                 | +                   | -                   |
| Dextrose                                     | +                   | +                   |
| L-Arginine                                   | +                   | +                   |
| Urea                                         | +                   | +                   |
| Aescin iron citrate                          | +                   | +                   |
| Gel (bovine source)                          | +                   | -                   |
| 4-Nitrobenzene- $\beta$ -D-galactopyranoside | +                   | +                   |
| Dextrose                                     | -                   | -                   |
| L-arabinose                                  | -                   | -                   |
| D-mannose                                    | -                   | -                   |
| D-mannitol                                   | -                   | -                   |
| N-Acetyl Glucosamine                         | -                   | -                   |
| D-maltose                                    | -                   | -                   |
| Potassium Gluconate                          | -                   | -                   |
| Capric acid                                  | -                   | -                   |
| Adipic acid                                  | -                   | -                   |
| Malic acid                                   | -                   | +                   |
| Sodium citrate                               | -                   | -                   |
| Phenylacetic acid                            | -                   | -                   |
| <b>Enzyme activity</b>                       |                     |                     |
| Alkaline phosphatase                         | +                   | +                   |
| Esterase(C4)                                 | +                   | +                   |
| Esterase lipase (C8)                         | +                   | +                   |
| Lipase (C14)                                 | +                   | +                   |
| Leucine arylamidase                          | +                   | +                   |
| Valine arylamidase                           | +                   | +                   |
| Cystine arylamidase                          | +                   | +                   |
| Trypsin                                      | +                   | -                   |
| Chymotrypsin                                 | +                   | -                   |
| Acid phosphatase                             | +                   | +                   |
| Naphthol-AS-BI-phosphohydrolase              | +                   | +                   |
| $\alpha$ -galactosidase                      | -                   | -                   |
| $\beta$ -galactosidase                       | -                   | -                   |
| $\beta$ -uronidase                           | -                   | -                   |
| $\alpha$ -glucosidase                        | +                   | -                   |
| $\beta$ -glucosidase                         | -                   | -                   |
| N-acetyl- $\beta$ -glucosaminidase           | +                   | -                   |
| $\alpha$ -mannosidase                        | -                   | -                   |
| $\alpha$ -fucosidase                         | -                   | -                   |
| Oxidase                                      | +                   | +                   |
| Catalase                                     | +                   | +                   |

+, positive; -, negative.

**Table S2** Clusters of Orthologous Group (COG) annotations of strain NH-LM1 genome.

| Categories | Function                                                      | Gene number | Ratio (%) |
|------------|---------------------------------------------------------------|-------------|-----------|
| C          | RNA processing and modification                               | 1           | 0.03      |
| D          | Energy production and conversion                              | 221         | 6.48      |
| E          | Cell cycle control, cell division, chromosome partitioning    | 61          | 1.79      |
| F          | Amino acid transport and metabolism                           | 284         | 8.33      |
| G          | Nucleotide transport and metabolism                           | 107         | 3.14      |
| H          | Carbohydrate transport and metabolism                         | 190         | 5.58      |
| I          | Coenzyme transport and metabolism                             | 199         | 5.84      |
| J          | Lipid transport and metabolism                                | 114         | 3.35      |
| K          | Translation, ribosomal structure and biogenesis               | 259         | 7.60      |
| L          | Transcription                                                 | 245         | 7.19      |
| M          | Replication, recombination and repair                         | 149         | 4.37      |
| N          | Cell wall/membrane/envelope biogenesis                        | 232         | 6.81      |
| O          | Cell motility                                                 | 88          | 2.58      |
| P          | Posttranslational modification, protein turnover, chaperones  | 183         | 5.37      |
| Q          | Inorganic ion transport and metabolism                        | 180         | 5.28      |
| R          | Secondary metabolites biosynthesis, transport and catabolism  | 38          | 1.12      |
| S          | General function prediction only                              | 217         | 6.37      |
| T          | Function unknown                                              | 134         | 3.93      |
| U          | Signal transduction mechanisms                                | 207         | 6.07      |
| V          | Intracellular trafficking, secretion, and vesicular transport | 100         | 2.93      |
| W          | Defense mechanisms                                            | 111         | 3.26      |
| Z          | Extracellular structures                                      | 41          | 1.20      |

**Table S3** Clusters of Orthologous Group (COG) annotations of strain NH-LM2 genome.

| Categories | Function                                                      | Gene number | Ratio (%) |
|------------|---------------------------------------------------------------|-------------|-----------|
| C          | RNA processing and modification                               | 1           | 0.02      |
| D          | Energy production and conversion                              | 263         | 5.76      |
| E          | Cell cycle control, cell division, chromosome partitioning    | 71          | 1.55      |
| F          | Amino acid transport and metabolism                           | 379         | 8.30      |
| G          | Nucleotide transport and metabolism                           | 110         | 2.41      |
| H          | Carbohydrate transport and metabolism                         | 278         | 6.09      |
| I          | Coenzyme transport and metabolism                             | 225         | 4.93      |
| J          | Lipid transport and metabolism                                | 168         | 3.68      |
| K          | Translation, ribosomal structure and biogenesis               | 272         | 5.96      |
| L          | Transcription                                                 | 364         | 7.97      |
| M          | Replication, recombination and repair                         | 184         | 4.03      |
| N          | Cell wall/membrane/envelope biogenesis                        | 298         | 6.53      |
| O          | Cell motility                                                 | 129         | 2.83      |
| P          | Posttranslational modification, protein turnover, chaperones  | 223         | 4.88      |
| Q          | Inorganic ion transport and metabolism                        | 242         | 5.30      |
| R          | Secondary metabolites biosynthesis, transport and catabolism  | 64          | 1.40      |
| S          | General function prediction only                              | 312         | 6.83      |
| T          | Function unknown                                              | 184         | 4.03      |
| U          | Signal transduction mechanisms                                | 352         | 7.71      |
| V          | Intracellular trafficking, secretion, and vesicular transport | 167         | 3.66      |
| W          | Defense mechanisms                                            | 154         | 3.37      |
| Z          | Extracellular structures                                      | 70          | 1.53      |

**Figures S1. Circular maps of the six plasmids of *Vibrio harveyi* NH-LM1.** The base pairs are indicated the inside circle (Circle 1). Circle 1 represents the coding genes colored according to their functional annotations based on COG database. Circle 2, GC content; Circle 3, GC skew+ (green) and GC skew- (purple). (A-F) Plasmid 1 to 6.

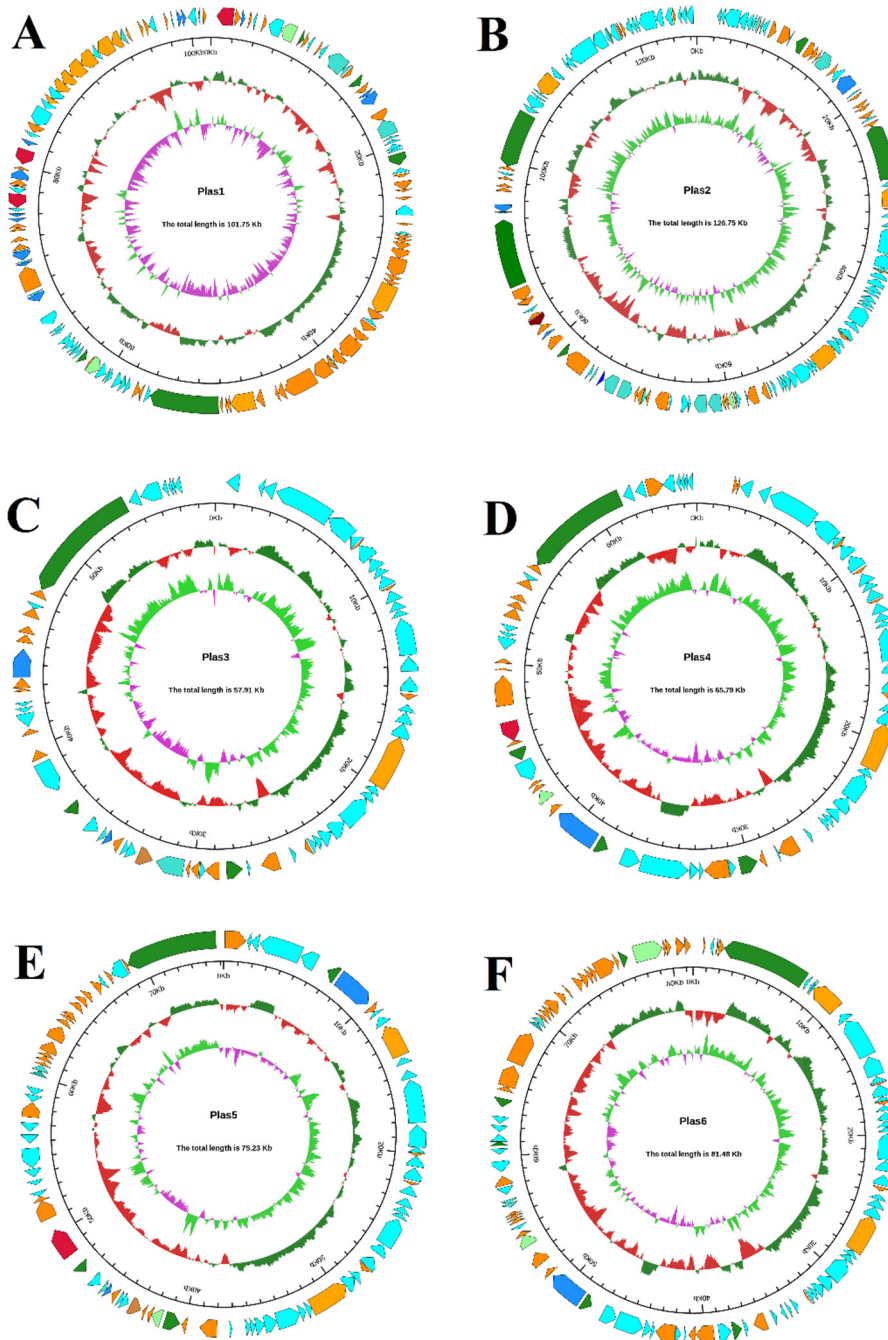

**Figure S2. Circular maps of the three plasmids of *Photobacterium damsela* subsp. *piscicida* NH-LM2.** The base pairs are indicated the inside circle (Circle 1). Circle 1 represents the coding genes colored according to their functional annotations based on COG database. Circle 2, GC content; Circle 3, GC skew+ (green) and GC skew- (purple). (A-C) Plasmid 1 to 3.

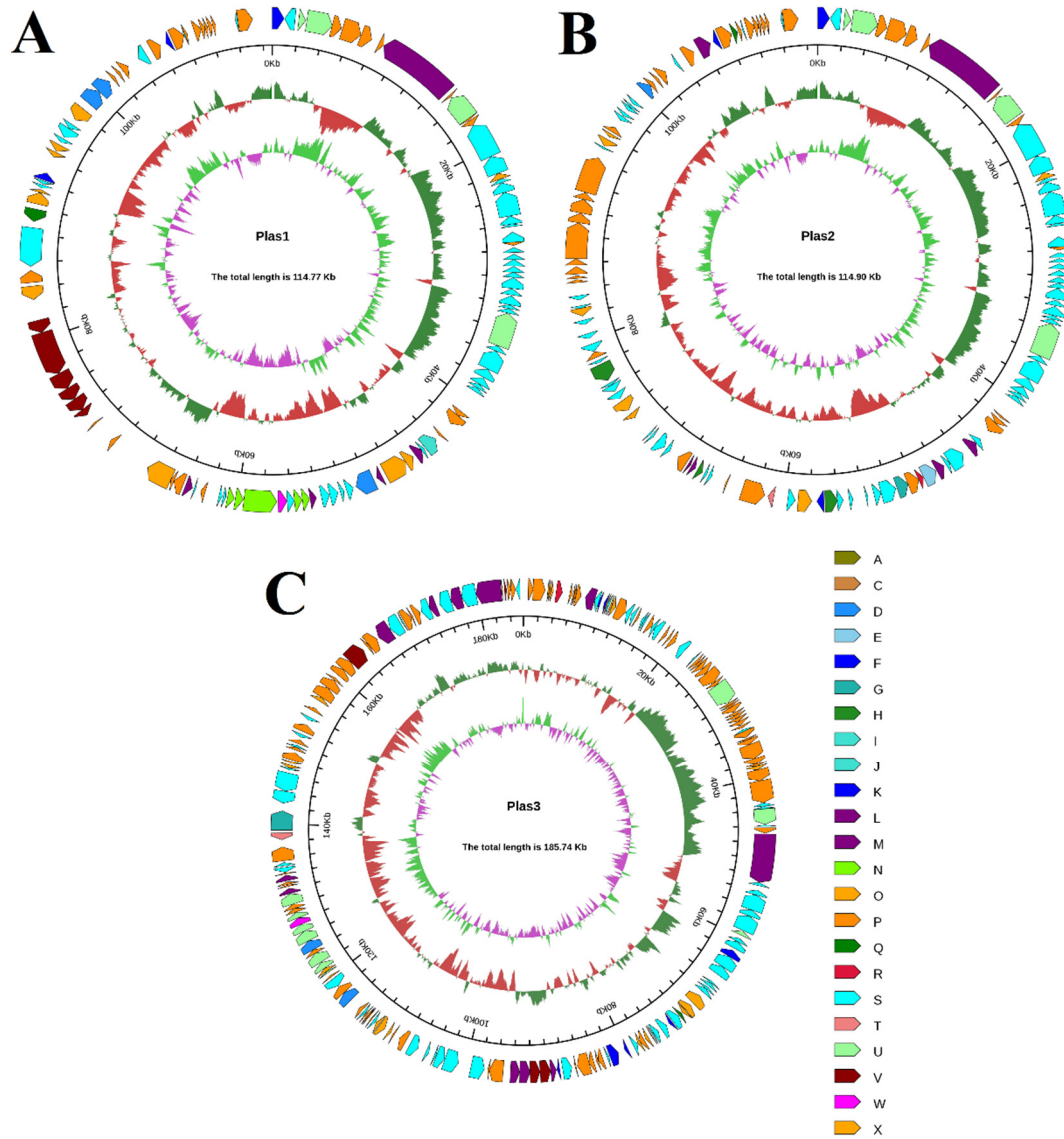

Supplement: s1 [file s1]
